# Supplementary material for: When Hearing Is Tricky: Speech Processing Strategies in Prelingually Deafened Children and Adolescents with Cochlear Implants Having Good and Poor Speech Performance
Source: PubMed Central journal article supplement (PMC5215792; doi:10.1371/journal.pone.0168655), 2017-01-05
Supplement: pone.0168655.s002.pdf [file pone.0168655.s002.pdf]

|                                                             | Good Performers                                                                                                                                                                                                                                       |                                                                                                                                                                                                 |                                                                                                                                                                                                                                                                                 | Bad Performers                                                                                                                                                                                                                               |                                                                                                                                                                                                  |                                                                                                          |
|-------------------------------------------------------------|-------------------------------------------------------------------------------------------------------------------------------------------------------------------------------------------------------------------------------------------------------|-------------------------------------------------------------------------------------------------------------------------------------------------------------------------------------------------|---------------------------------------------------------------------------------------------------------------------------------------------------------------------------------------------------------------------------------------------------------------------------------|----------------------------------------------------------------------------------------------------------------------------------------------------------------------------------------------------------------------------------------------|--------------------------------------------------------------------------------------------------------------------------------------------------------------------------------------------------|----------------------------------------------------------------------------------------------------------|
| Assessment of speech/ language performance                  | 1                                                                                                                                                                                                                                                     | 2                                                                                                                                                                                               | 3                                                                                                                                                                                                                                                                               | 4                                                                                                                                                                                                                                            | 5                                                                                                                                                                                                | 6                                                                                                        |
| Articulation (based on Fox, 2003)                           | No conspicuousness; inconspicuous sound of voice in spontaneous speech (no noticeable nasality; prosody and pitch of speaking voice inconspicuous)                                                                                                    | Minor phonological abnormalities (e.g. elisions of unstressed syllables); good intelligibility and inconspicuous sound of voice                                                                 | Mildly impaired comprehensibility, phonological abnormalities (substitution of vowels or consonants; assimilations of consonants; reduction of syllables within words, elisions or addition of consonants) appear repeatedly and/or mild phonetic abnormalities (e.g. dyslalia) | Phonological errors appear frequently and/or 2-3 consonants cannot be formed and/or impaired vocal sound; comprehensibility is reduced                                                                                                       | Incomplete phonemic inventory (conspicuous phonetic development) and/or many phonological errors and/or strongly modified sound of voice (e.g. nasality) that affects comprehensibility severely | Almost incomprehensible spontaneous speech                                                               |
| Syntactic and morphological skills (based on Clahsen, 1988) | Inconspicuous syntax (correct position of verbs in main- and subordinate clauses) and morphology (correct usage of morphological rules: gender-, case- and tense-marking; subject-verb congruency and plurals are used without errors)                | Minor morphological abnormalities (e.g. impaired dative marking), syntactical rules are reliably mastered (correct position of verbs in main- and subordinate clauses)                          | Frequent morphological abnormalities (considerable difficulties in case marking, conspicuous subject-verb congruency); syntactical rules are generally mastered                                                                                                                 | Many morphological abnormalities and/or word order is not used systematically and/or reduced and conspicuous usage of function words (prepositions, conjugation, pronouns)                                                                   | Many morphological abnormalities, unsystematic word order, strongly reduced usage of function words (prepositions, conjugation, pronouns)                                                        | Absent development of syntactic and morphological abnormalities, variable word order, no word inflection |
| Semantics and lexicon (based on Glück, 2011)                | Very good development of lexicon; good and flexible ability to formulate; Test for Lexicon and Word Finding (WWT): Above average performance in the highest age-norms (t-value >60) or very good development according to hearing age (t-value 50-60) | Minor abnormalities in development of lexicon; WWT: good results in relation to age-norm from 10 to 12 years (t-value 40-60) or inconspicuous results according to hearing age (t-value: 50-40) | Abnormalities in vocabulary development; formulations without variations; WWT: conspicuous results in relation to age norm 8-10 years or conspicuous results according to hearing age (t-value < 40)                                                                            | Reduced vocabulary development for content- and function words, strong abnormalities for low-frequency words; WWT: conspicuous results (t-value < 40 in the age norm 6-8 years) or significantly below average in hearing age adjusted norms | Only usage of high frequent function and content words                                                                                                                                           | Rudimentary vocabulary; Almost exclusive use of nouns                                                    |

|                                               |                                                                                                         |                                                                                                                                                                                                                                                                                                   |                                                                                                                               |                                                                                                                                                                              |                                                                                             |                                                                                                                                                                          |
|-----------------------------------------------|---------------------------------------------------------------------------------------------------------|---------------------------------------------------------------------------------------------------------------------------------------------------------------------------------------------------------------------------------------------------------------------------------------------------|-------------------------------------------------------------------------------------------------------------------------------|------------------------------------------------------------------------------------------------------------------------------------------------------------------------------|---------------------------------------------------------------------------------------------|--------------------------------------------------------------------------------------------------------------------------------------------------------------------------|
| Receptive language<br>(based on Fox,<br>2011) | Inconspicuous TROG-D:<br>highly developed<br>comprehension of case<br>markings and complex<br>sentences | Minor difficulties in<br>language comprehension,<br>only slightly noticeable<br>during conversation.<br>TROG-D: able to<br>comprehend complex<br>sentence structures,<br>understanding of<br>personal pronouns in<br>accusative and dative and<br>double-object-<br>constructions are<br>possible | Mild difficulties in<br>language comprehension,<br>TROG-D: able to<br>comprehend passive<br>sentences and simple<br>sentences | Frequent difficulties in<br>language comprehension<br>TROG-D: able to<br>comprehend longer main<br>clauses and dependent<br>clauses in first position<br>(because-sentences) | Highly impaired in<br>language comprehension;<br>able to comprehend<br>simple SVO sentences | Comprehension of single<br>words; meaning is<br>deducted from context;<br>unable to comprehend<br>conversations about<br>topics not grounded in<br>the current situation |
|-----------------------------------------------|---------------------------------------------------------------------------------------------------------|---------------------------------------------------------------------------------------------------------------------------------------------------------------------------------------------------------------------------------------------------------------------------------------------------|-------------------------------------------------------------------------------------------------------------------------------|------------------------------------------------------------------------------------------------------------------------------------------------------------------------------|---------------------------------------------------------------------------------------------|--------------------------------------------------------------------------------------------------------------------------------------------------------------------------|

References:

Clahsen H. Normale und gestörte Kindersprache. Linguistische Untersuchungen zum Erwerb von Syntax und Morphologie. Amsterdam: 1988.

Fox A V. Kindliche Aussprachestörungen - Phonologischer Erwerb, Differenzdiagnostik, Therapie. 5th ed. Schulz-Kirchner; 2003.

Fox A V. TROG-D - Test zur Überprüfung des Grammatikverständnisses. 5th ed. Schulz-Kirchner; 2011.

Glück C W. Wortschatz- und Wortfindungstest für 6- bis 10-Jährige. 2nd ed. Urban & Fischer Verlag/Elsevier GmbH; 2011.
