# Supplementary material for: When Hearing Is Tricky: Speech Processing Strategies in Prelingually Deafened Children and Adolescents with Cochlear Implants Having Good and Poor Speech Performance
Source: PubMed Central journal article supplement (PMC5215792; doi:10.1371/journal.pone.0168655), 2017-01-05
Supplement: pone.0168655.s003.pdf [file pone.0168655.s003.pdf]

**Table 2: Speech intelligibility**

| Pair                      | Group | FMWT                         |                         | MedEL Teen- Ears Test Battery |                                     |                                   |
|---------------------------|-------|------------------------------|-------------------------|-------------------------------|-------------------------------------|-----------------------------------|
|                           |       | Word recognition (% correct) | Stimulus intensity (dB) | # of syllables (% correct)    | Sentences in closed set (% correct) | Sentences in open set (% correct) |
| 1                         | GP    | 95                           | 85                      | 100                           | 100                                 | 100                               |
|                           | BP    | 75                           | 85                      | 100                           | 100                                 | 90                                |
| 2                         | GP    | 90                           | 75                      | 100                           | 100                                 | 100                               |
|                           | BP    | 70                           | 75                      | 100                           | 100                                 | 85                                |
| 3                         | GP    | 100                          | 65                      | 100                           | 100                                 | 100                               |
|                           | BP    | 70                           | 75                      | 100                           | 100                                 | 90                                |
| 4                         | GP    | 100                          | 75                      | 100                           | 100                                 | 100                               |
|                           | BP    | 80                           | 75                      | 100                           | 100                                 | 100                               |
| 5                         | GP    | 100                          | 75                      | 100                           | 100                                 | 100                               |
|                           | BP    | 75                           | 85                      | 100                           | 100                                 | 90                                |
| 6                         | GP    | 100                          | 85                      | 100                           | 100                                 | 100                               |
|                           | BP    | 85                           | 85                      | 100                           | 100                                 | 70                                |
| 7                         | GP    | 100                          | 75                      | 100                           | 100                                 | 100                               |
|                           | BP    | 70                           | 75                      | 100                           | 100                                 | 80                                |
| 8                         | GP    | 100                          | 75                      | 100                           | 100                                 | 100                               |
|                           | BP    | 85                           | 75                      | 100                           | 100                                 | 95                                |
| 9*                        | GP    | 70                           | 65                      | 100                           | 100                                 | 95                                |
|                           | BP    | 80                           | 85                      | 100                           | 100                                 | 85                                |
| GP:                       |       |                              |                         |                               |                                     |                                   |
| Mean (SD):                |       | 95 (9.4)                     |                         | 100 (0)                       | 100 (0)                             | 99.4 (1.57)                       |
| Mean (SD) without pair 9: |       | 98.1 (9.8)                   |                         | 100 (0)                       | 100 (0)                             | 100 (0)                           |
| BP:                       |       |                              |                         |                               |                                     |                                   |
| Mean (SD):                |       | 76.7 (5.8)                   |                         | 100 (0)                       | 100 (0)                             | 87.2 (8.2)                        |
| Mean (SD) without pair 9: |       | 76.3 (5.99)                  |                         | 100 (0)                       | 100 (0)                             | 87.5 (8.66)                       |

Legend: Speech intelligibility in the Freiburg Monosyllable Word Test (FMWT) and the three subtests of the Teen-Ears Test Battery. Results show that basic speech intelligibility was good to very good in both groups and across all four tests. The FMWT was assessed at each participant's most comfortable intensity (dB). Please note that stimulus intensity during EEG measurement and phoneme differentiation task was also defined via the most comfortable sound level.
