# Supplementary material for: When Hearing Is Tricky: Speech Processing Strategies in Prelingually Deafened Children and Adolescents with Cochlear Implants Having Good and Poor Speech Performance
Source: PubMed Central journal article supplement (PMC5215792; doi:10.1371/journal.pone.0168655), 2017-01-05
Supplement: pone.0168655.s004.pdf [file pone.0168655.s004.pdf]

## Subjective rating of hearing

(According to the Manchester Teens Questionnaire: Post-operative)

|                                                                                                                        | never | rarely<br>ever | sometimes | often | always |
|------------------------------------------------------------------------------------------------------------------------|-------|----------------|-----------|-------|--------|
| Are you able to discriminate sounds with your CI only by listening? (E.g. a car, a phone, a door bell, a barking dog)? |       |                |           |       |        |
| Do you understand family and friends only by listening?                                                                |       |                |           |       |        |
| Do you understand unknown persons / strangers only by listening?                                                       |       |                |           |       |        |
| Do you easily understand people in noisy surroundings?                                                                 |       |                |           |       |        |
| Do you understand what is said in a group?                                                                             |       |                |           |       |        |
| Are you able to take part in a conversation in a group?                                                                |       |                |           |       |        |
| Do you feel at ease when talking to people that you do not know very well?                                             |       |                |           |       |        |
| Do you contact your friends and family on the phone?                                                                   |       |                |           |       |        |
| Do you contact unknown persons on the phone?                                                                           |       |                |           |       |        |
| Do you easily understand telephone talk?                                                                               |       |                |           |       |        |
| Do you like watching TV?                                                                                               |       |                |           |       |        |
| Do you like listening to music?                                                                                        |       |                |           |       |        |
